# Supplementary figures and images for: Nkx6-1 controls the identity and fate of red nucleus and oculomotor neurons in the mouse midbrain
Source: Oxford University Press journal article supplement (doi:10.1242/dev.031781), 2009-07-10

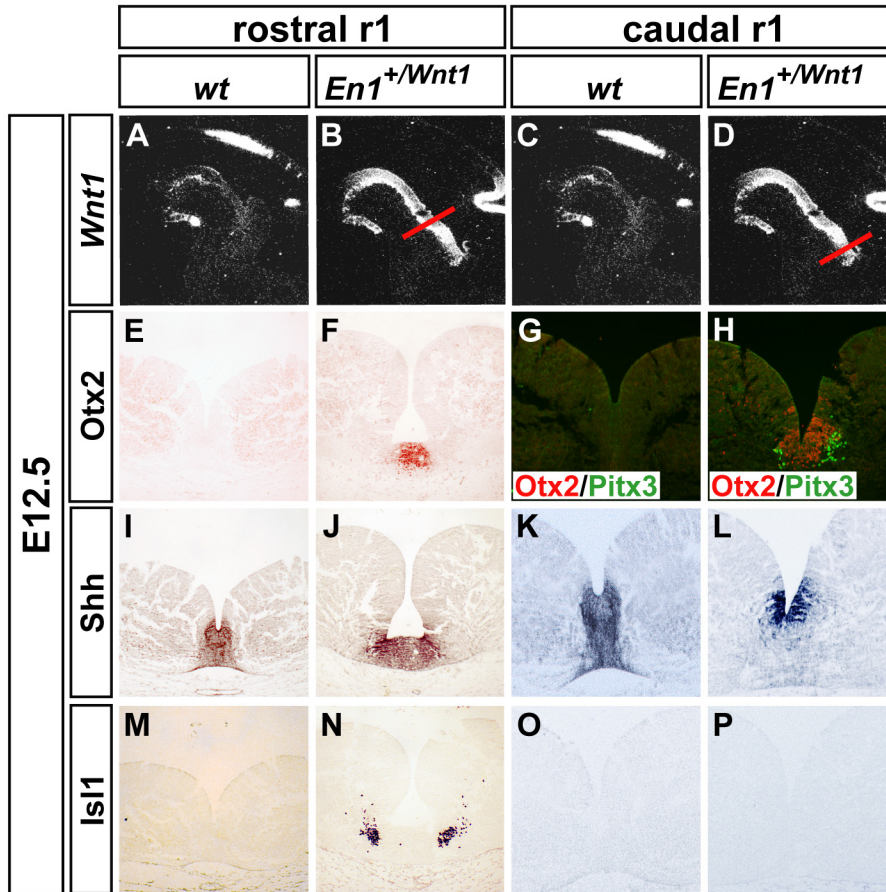

Supplement: dev031781-sup-031781-figs2.pdf [file dev031781-sup-031781-figs2.pdf]

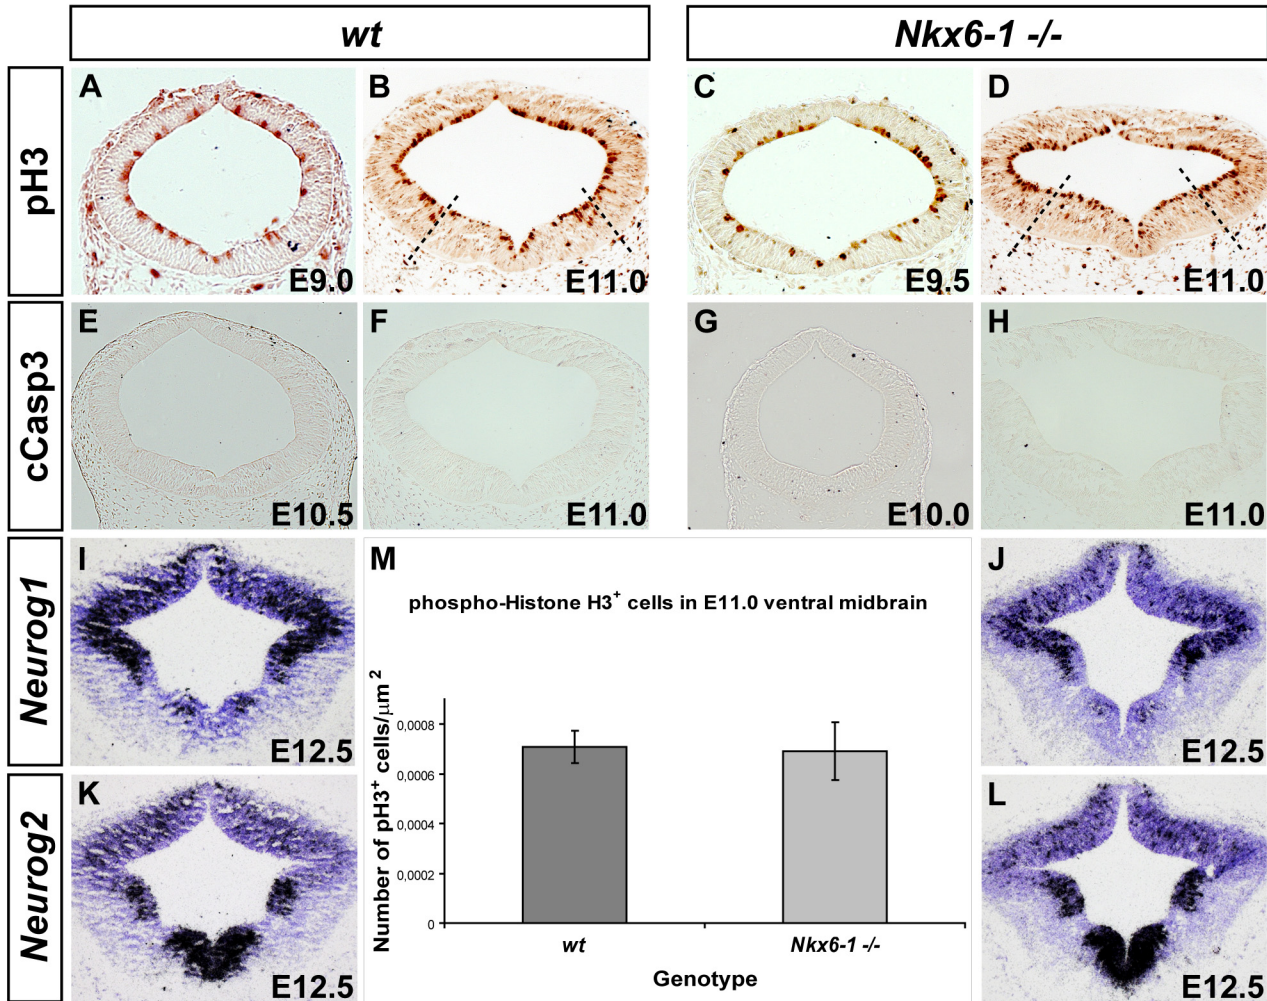

Supplement: dev031781-sup-031781-figs3.pdf [file dev031781-sup-031781-figs3.pdf]

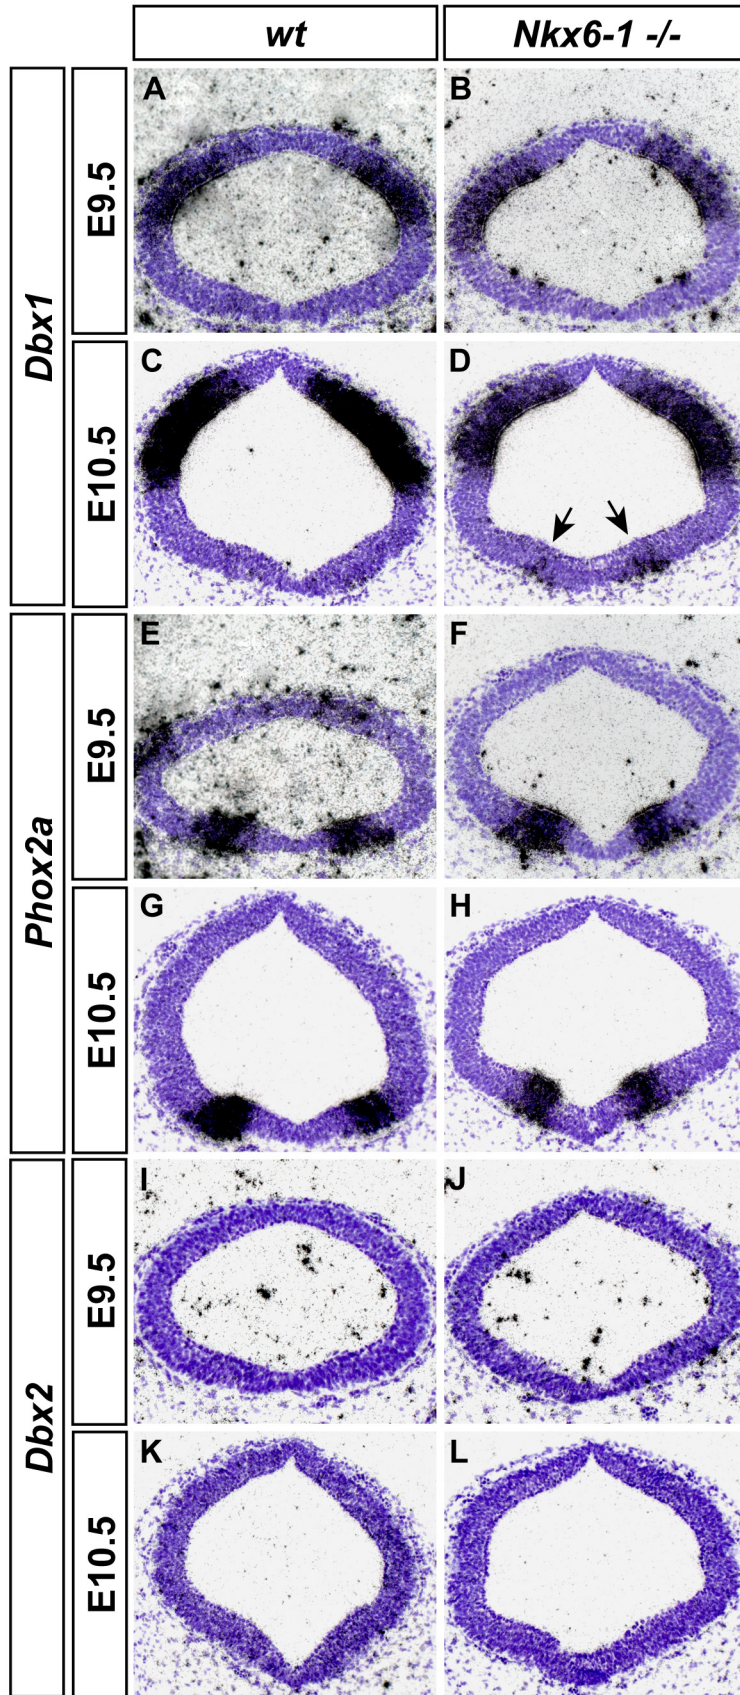

Supplement: dev031781-sup-031781-figs4.pdf [file dev031781-sup-031781-figs4.pdf]

E12.5

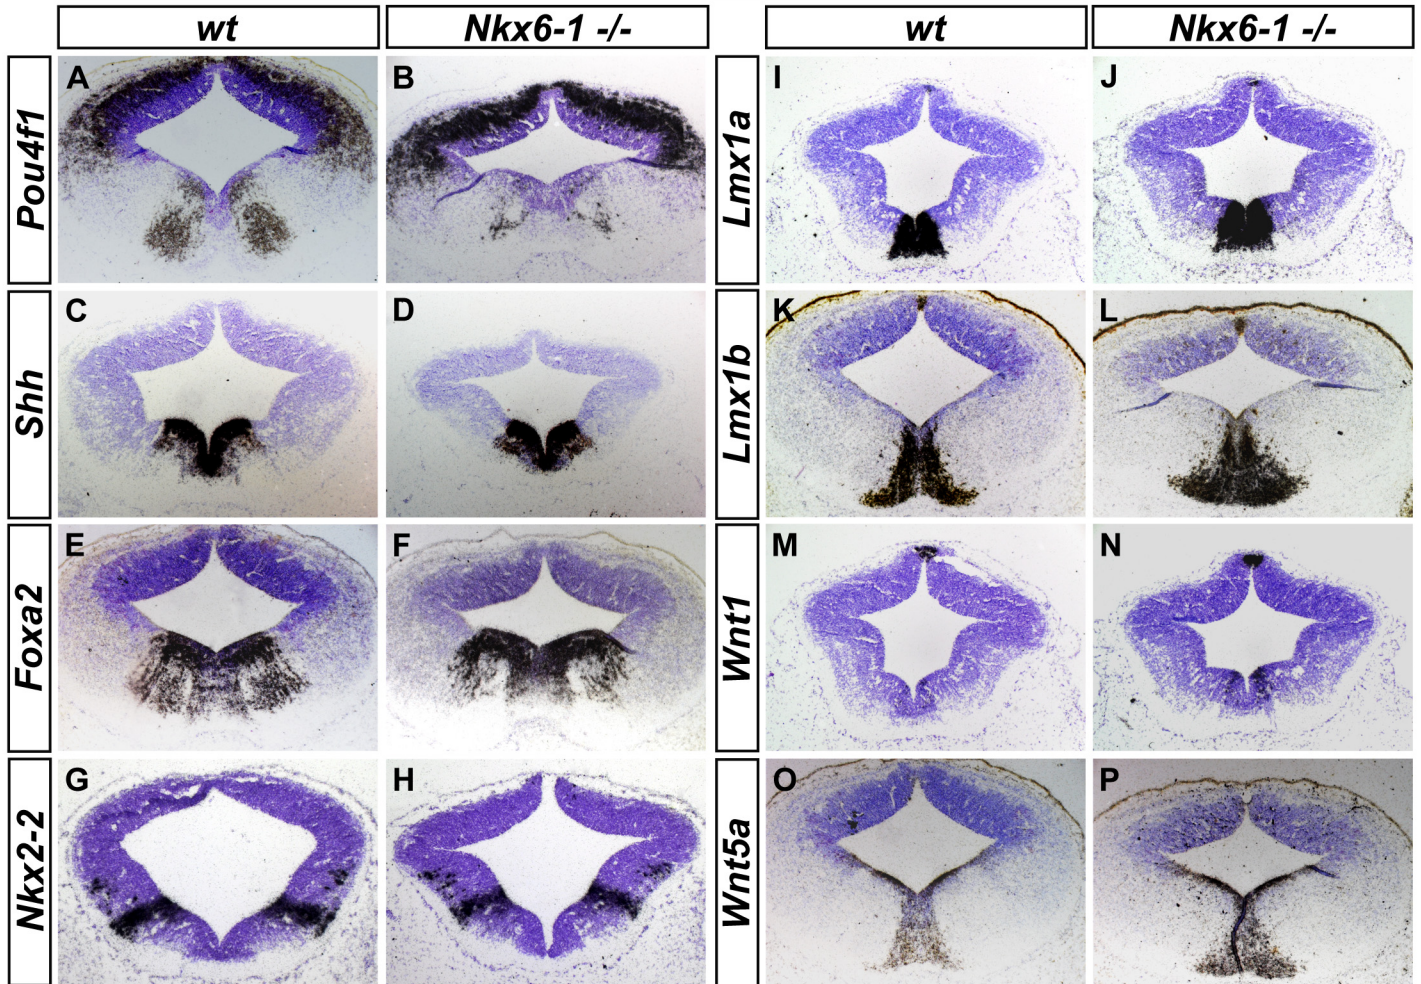

Supplement: dev031781-sup-031781-figs5.pdf [file dev031781-sup-031781-figs5.pdf]

E12.5

*wt*

*Nkx6-1* *-/-*

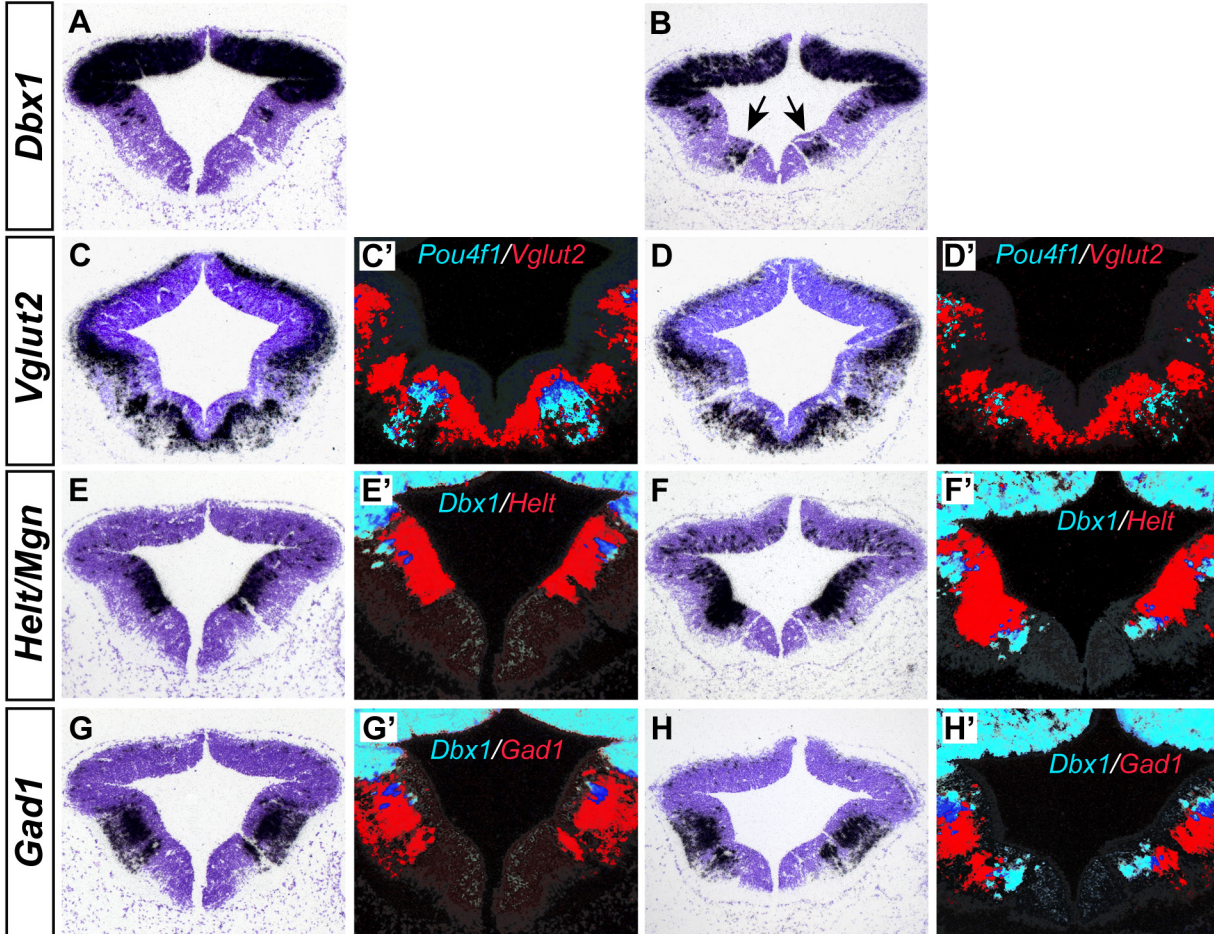

Supplement: dev031781-sup-031781-figs6.pdf [file dev031781-sup-031781-figs6.pdf]

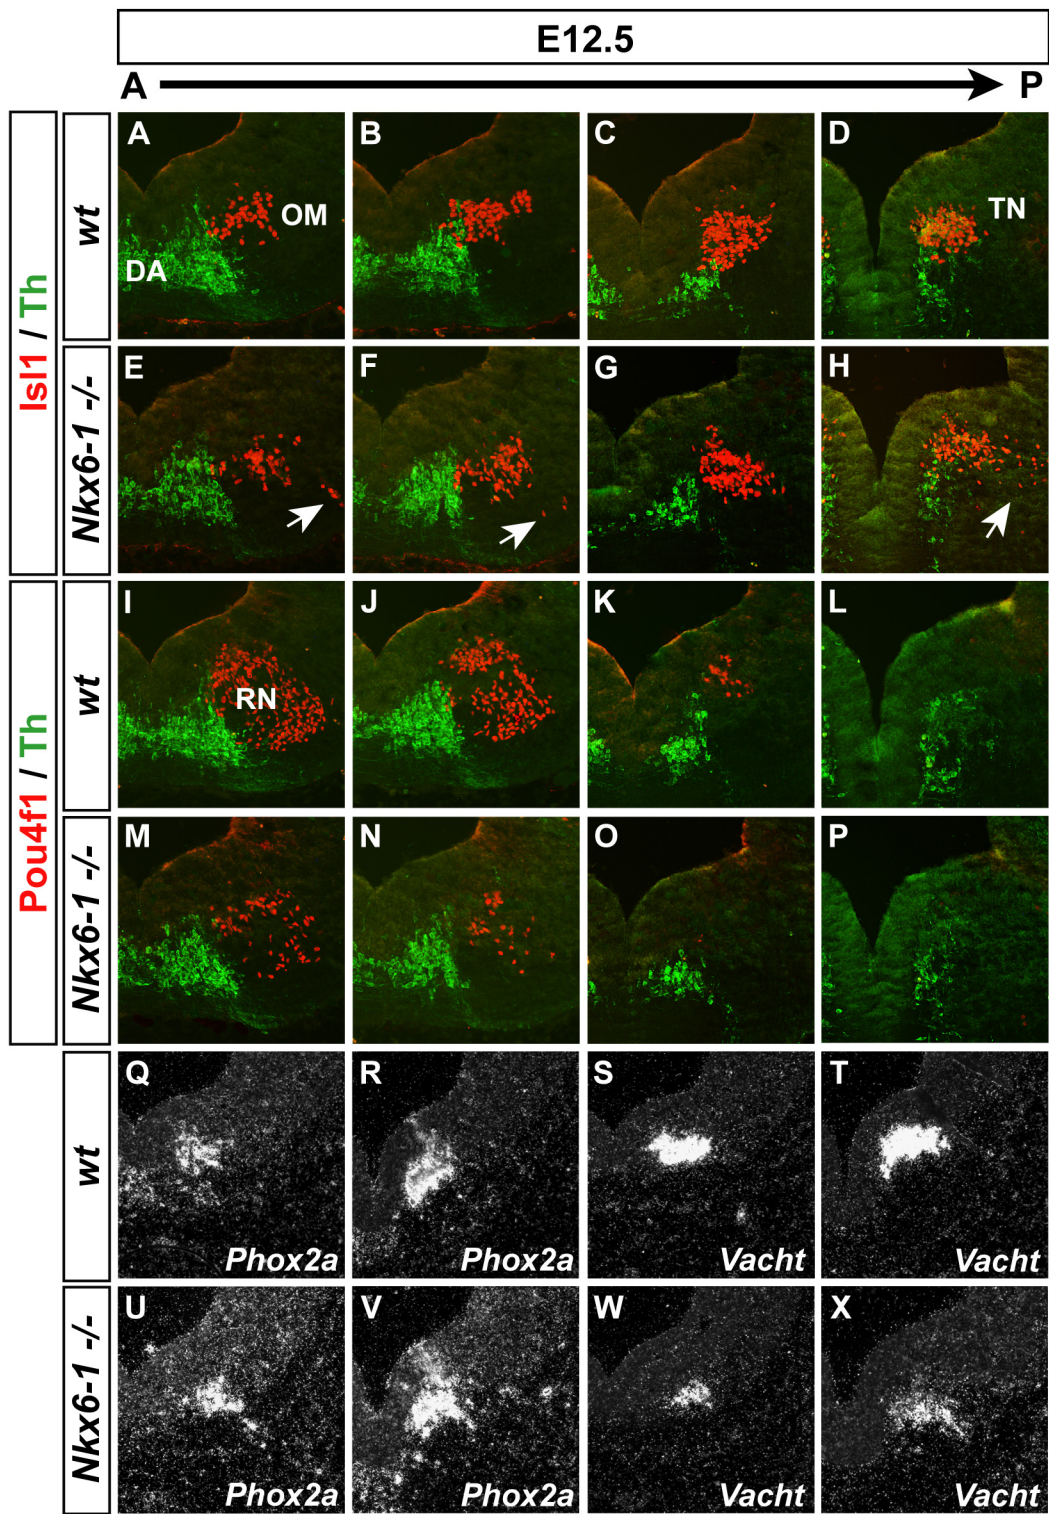

Supplement: dev031781-sup-031781-figs7.pdf [file dev031781-sup-031781-figs7.pdf]

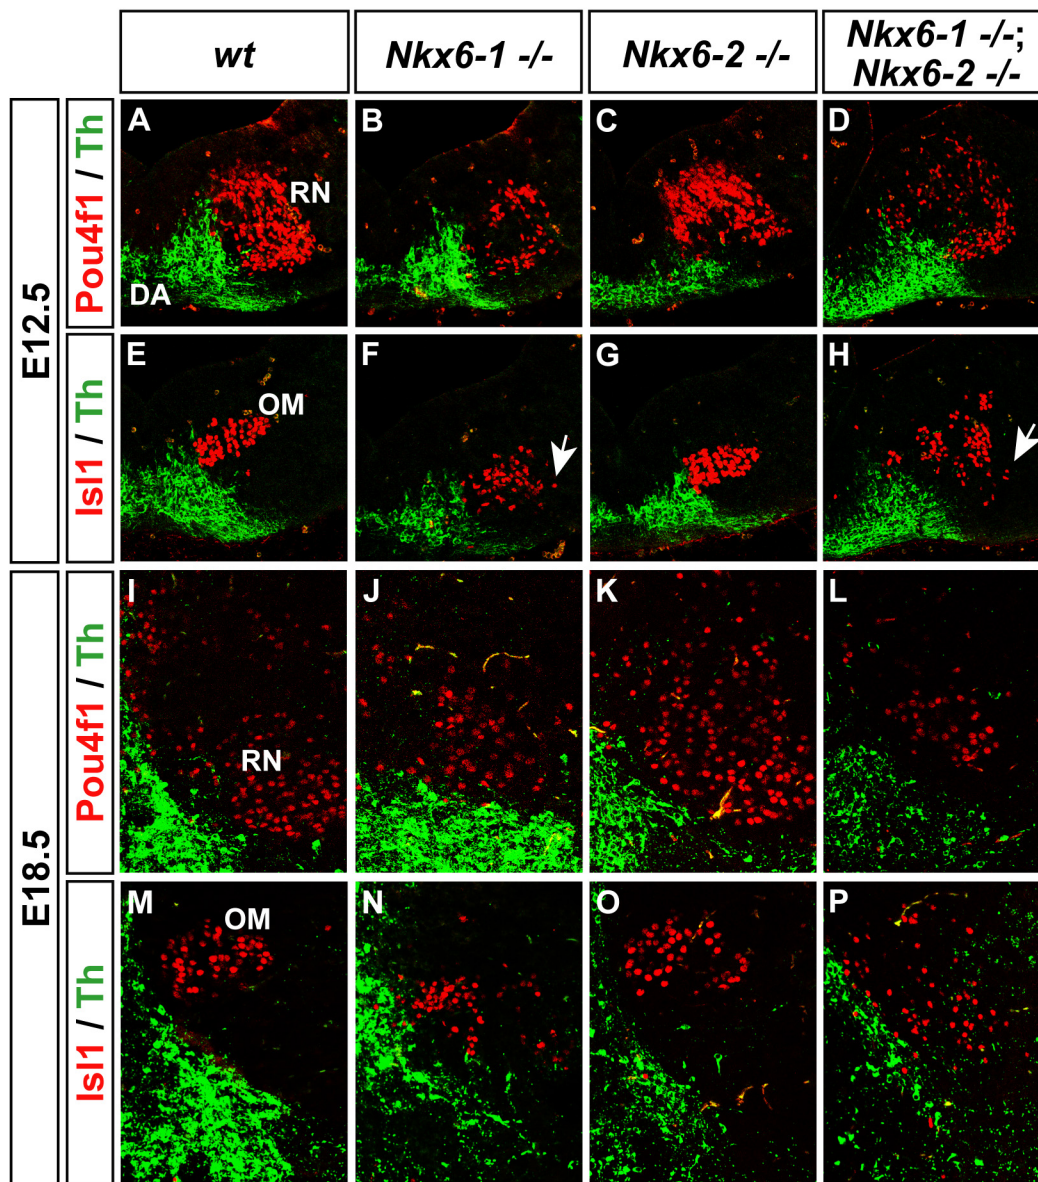

Supplement: dev031781-sup-031781-figs8.pdf [file dev031781-sup-031781-figs8.pdf]

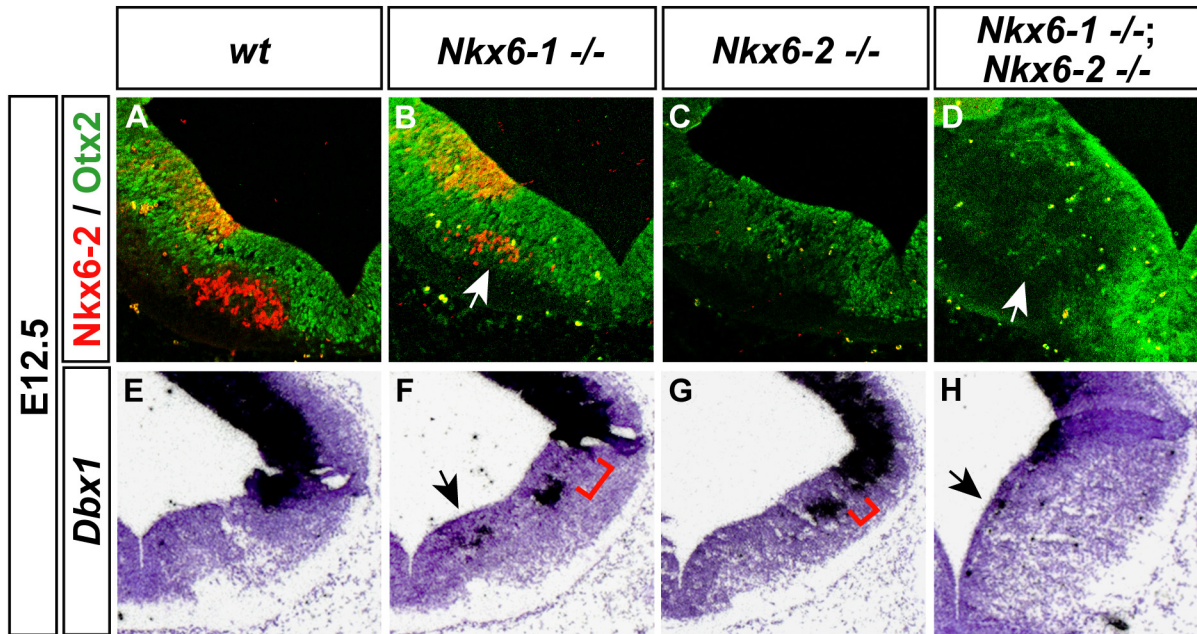

Supplement: dev031781-sup-031781-figs9.pdf [file dev031781-sup-031781-figs9.pdf]
